# Supplementary material for: Effects of Thyme (Thymus vulgaris L.) Essential Oil on Aging-Induced Brain Inflammation and Blood Telomere Attrition in Chronologically Aged C57BL/6J Mice
Source: MDPI journal article supplement (doi:10.3390/antiox12061178), 2023-05-30
Supplement: s1 [file s1]

**Effects of Thyme (*Thymus vulgaris* L.) Essential Oil on Aging-Induced Brain Inflammation and Blood Telomere Attrition in Chronologically Aged C57BL/6J Mice**

Dwina Juliana Warman, Huijuan Jia, and Hisanori Kato

**Supplementary Materials**

**Table S1.** Diet composition used in the animal experiment

| Ingredients              | Amount (% <i>w/w</i> ) |              |
|--------------------------|------------------------|--------------|
|                          | Control                | TEO          |
| β-Cornstarch             | 39.7                   | 39.6         |
| Casein                   | 20.0                   | 20.0         |
| α-Cornstarch             | 13.2                   | 13.2         |
| Sucrose                  | 10.3                   | 10.3         |
| Soybean oil              | 7.0                    | 7.0          |
| Fiber                    | 5.0                    | 5.0          |
| Mineral mix (AIN-93G-MX) | 3.5                    | 3.5          |
| Vitamin mix (AIN-93G-MX) | 1.0                    | 1.0          |
| L-Cystine                | 0.3                    | 0.3          |
| Thyme Essential Oil      | 0.0                    | 0.20         |
| <b>Total</b>             | <b>100.0</b>           | <b>100.0</b> |

**Table S2.** Mouse primer sequences used for the quantitative real-time polymerase chain reaction (qRT-PCR)

| Symbol                     | Gene Name                                | Accession Number | Sequences (5' to 3')                                                                                                                            |
|----------------------------|------------------------------------------|------------------|-------------------------------------------------------------------------------------------------------------------------------------------------|
| <i>Actb</i>                | Beta actin                               | NM_007393        | F: gacggccaggtcatcactat<br>R: ctctgcatcctgtcagcaa                                                                                               |
| <i>Gapdh</i>               | Glyceraldehyde-3-phosphate dehydrogenase | NM_008084        | F: tgtgtccgtcgtggatctga<br>R: ttgctgttgaagtcgcaggag                                                                                             |
| <i>p16<sup>INK4A</sup></i> | Cyclin-dependent kinase inhibitor 2A     | NM_001040654.1   | F: cccaacgccccgaact<br>R: gcagaagagctgctactgtgaa                                                                                                |
| <i>p21</i>                 | Cyclin-dependent kinase inhibitor 1A     | NM_007669.5      | F: cagcctgacagatttctatcactcc<br>R: tcctgaccacagcagaagag                                                                                         |
| <i>p53</i>                 | Tumor protein p53                        | NM_001127233     | F: ccgccgacctatccttaccat<br>R: caggcacaaacacgaacctca                                                                                            |
| <i>Il6</i>                 | Interleukin 6                            | NM_031168.2      | Liver:<br>F: ctgggtccttagccactccttc<br>R: gccagagtcttcagagagataca<br><br>Brain:<br>F: ctggctttgtctttcttgg<br>R: atttctctggctctctgg              |
| <i>Il1b</i>                | Interleukin 1 beta                       | NM_008361.4      | F: tcgctcagggtcacaga<br>R: atcagaggcaaggaggaacac                                                                                                |
| <i>Tnfa</i>                | Tumor necrosis factor alpha              | NM_001278601.1   | Liver:<br>F: acattcgaggctccagtgaattcgg<br>R: ggcaggtctactttggagtcattgc<br><br>Brain:<br>F: ctgttgccctctcttttgctta<br>R: ctttatttcttcaatgaccgtag |
| <i>Rb</i>                  | Retinoblastoma                           | XM_036158527     | F: aaccagcagtgcttattct<br>R: ggtgttcgaggtgaaccatt                                                                                               |
| <i>Cxcl1</i>               | C-X-C motif chemokine ligand 1           | NM_008176.3      | F: actgcaccaaaccgaagtc<br>R: tggggacaccttttagcatctt                                                                                             |
| <i>Ccl2</i>                | Chemokines C-C motif chemokine ligand 2  | NM_011333.3      | F:<br>gagtagcagcaggtgagtggggcgta<br>R: cagcaccagcaccagccaactctca                                                                                |

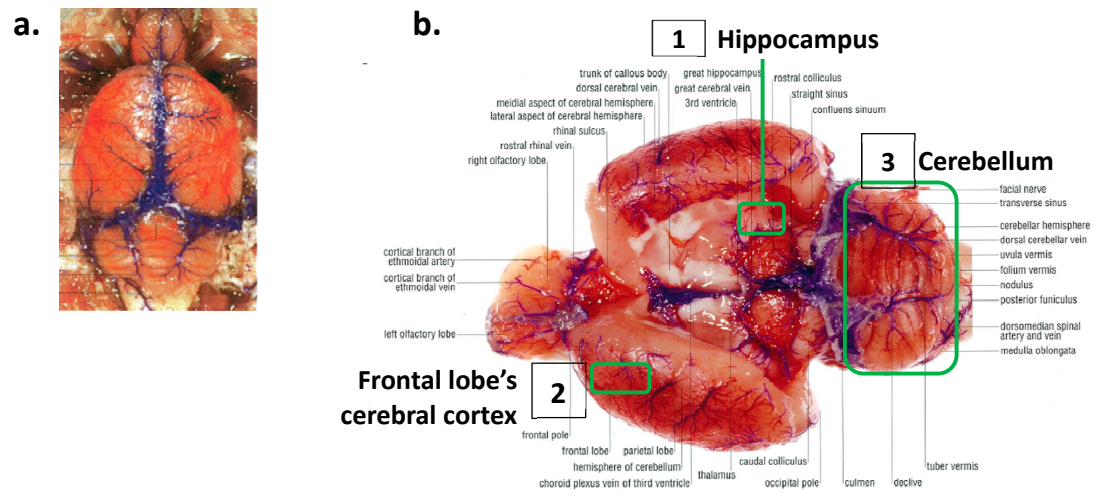

**Figure S1.** Mouse brain anatomy [66]. (a) Top view, (b) details of brain parts (bottom view). Parts marked with green box are the location from which 1) hippocampus, 2) cerebral cortex, and 3) cerebellum were collected and analyzed.

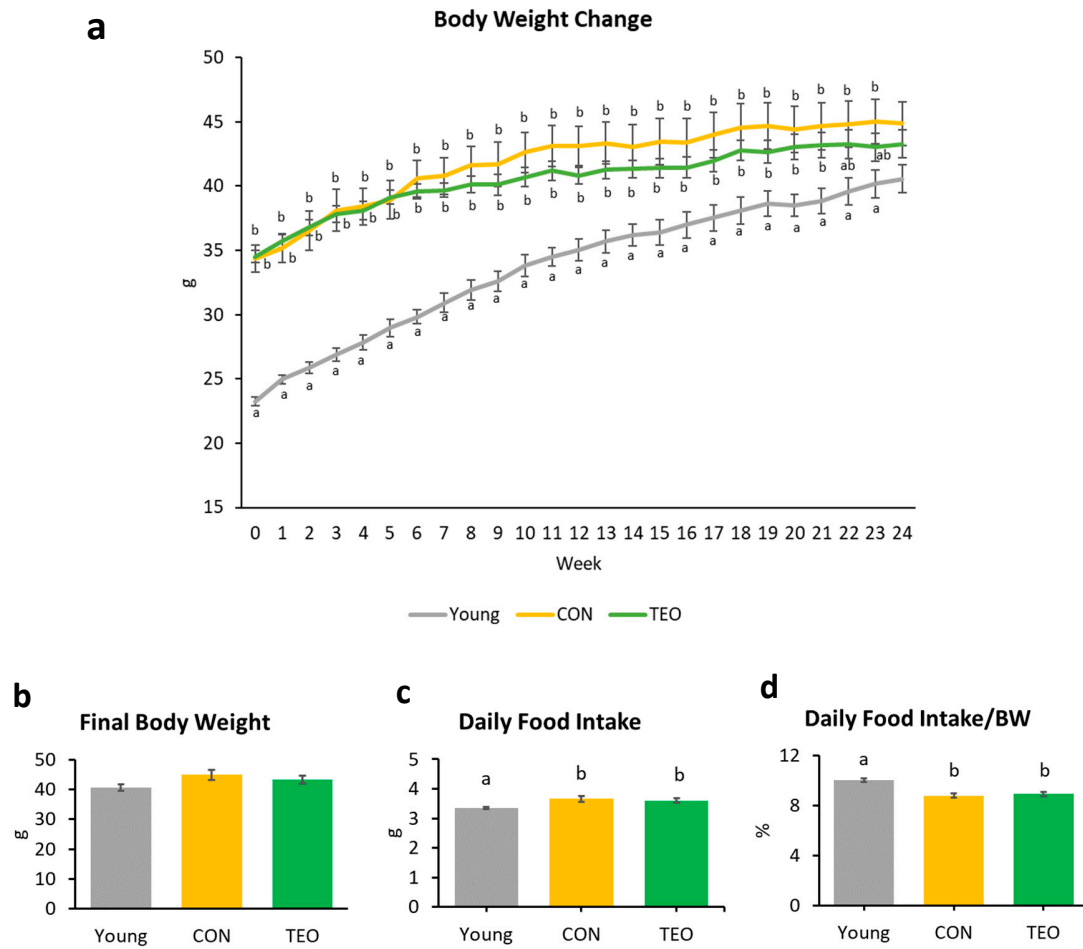

**Figure S2.** General characteristics of mice. **(a)** Body weight (BW) changes of each experimental group, **(b)** final BW at week 24, **(c)** absolute daily food intake, and **(d)** relative daily food intake per 100 g of body weights. g, gram. All values are expressed as the mean  $\pm$  SE ( $n = 7-11$ ). Different letters indicate significant differences ( $p < 0.05$ , Tukey's HSD test).

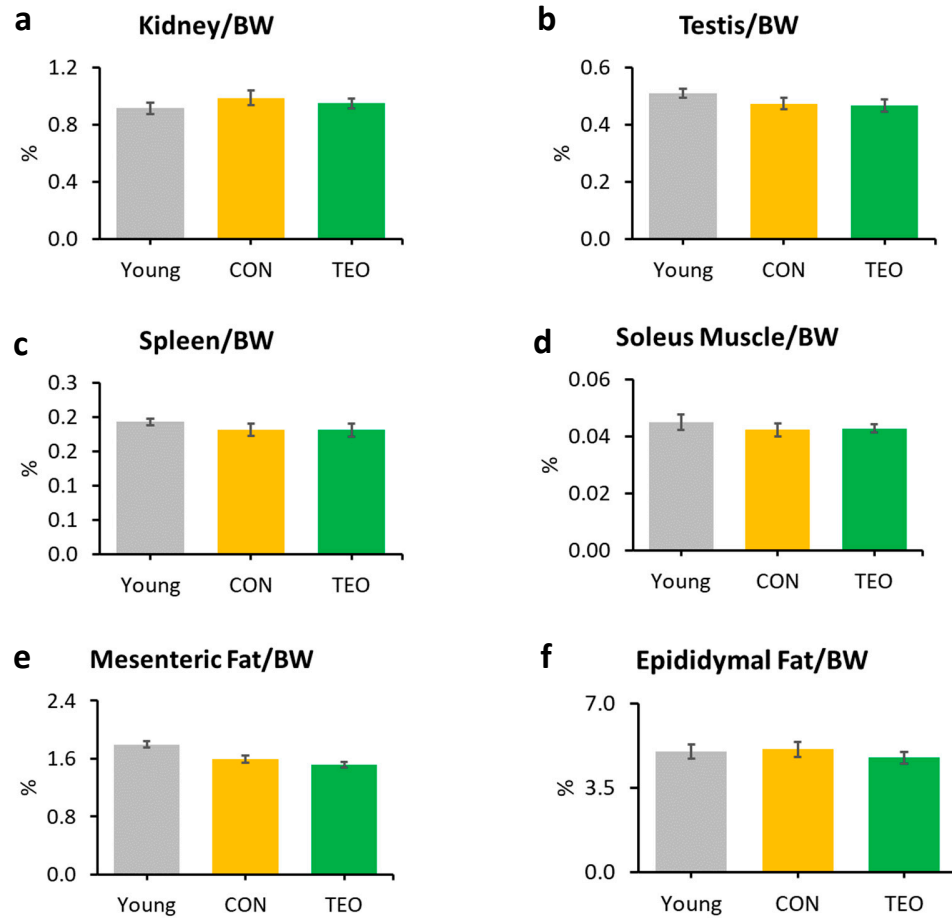

**Figure S3.** Organ relative weights per 100 g of body weights (BW) in each group after 24 weeks of experimental diet intervention. (a) kidney, (b) testis, (c) spleen, (d) soleus muscle, (e) mesenteric fat, (f) epididymal fat. All values are expressed as the mean  $\pm$  SE ( $n = 7-11$ ). Different letters indicate significant differences ( $p < 0.05$ , Tukey's HSD test).

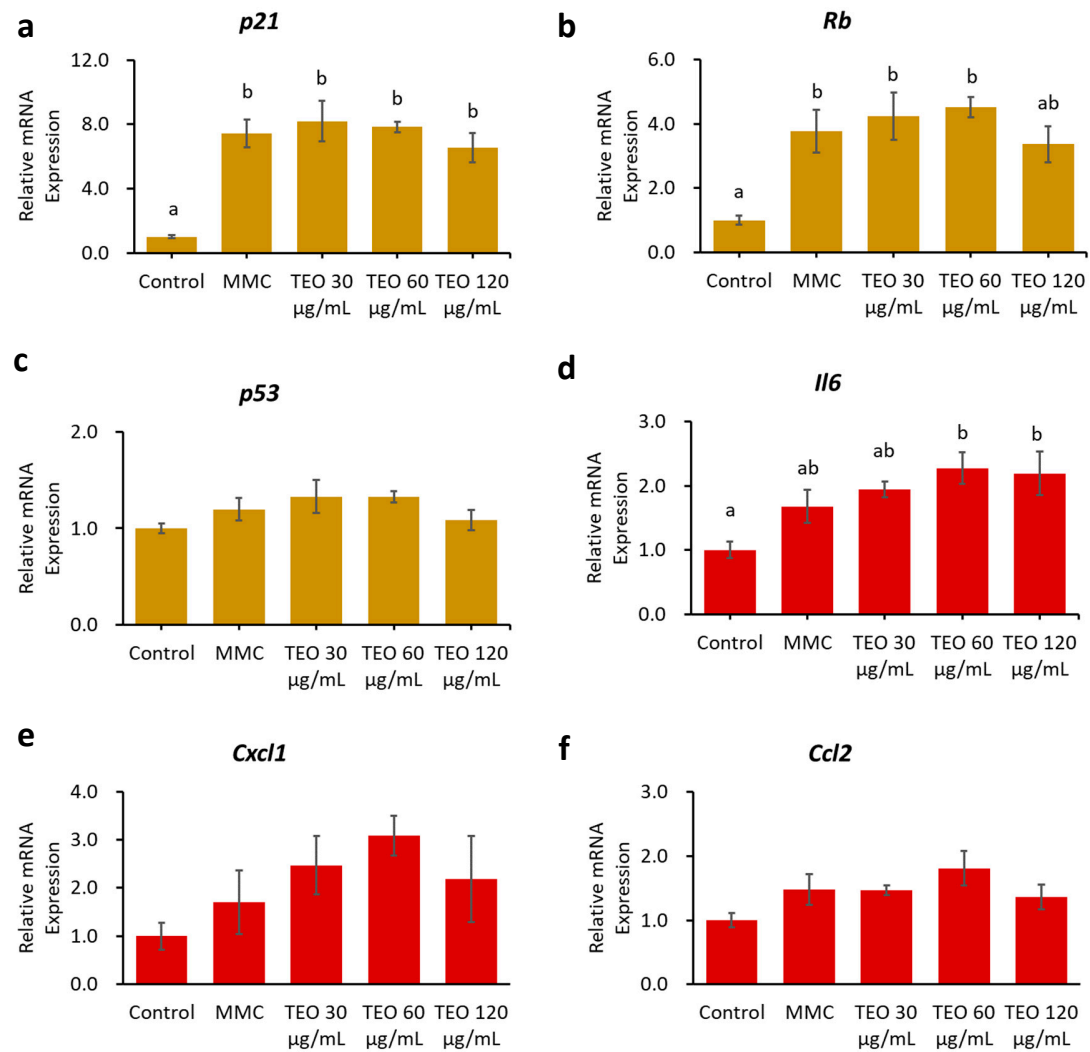

**Figure S4.** Effects of 24-h pretreatment with TEO on mRNA expression of aging-related genes: (a) *p21*, (b) *Rb*, (c) *p53*; Pro-inflammatory cytokine (d) *Il6*; and Pro-inflammatory chemokines: (e) *Cxcl1*, (f) *Ccl2*. All values are expressed as the mean  $\pm$  SE ( $n = 3$ ). Different letters indicate significant differences ( $p < 0.05$ , Tukey's HSD test).
